# Supplementary material for: BMP9-ID1 Pathway Attenuates N6-Methyladenosine Levels of CyclinD1 to Promote Cell Proliferation in Hepatocellular Carcinoma
Source: MDPI journal article supplement (doi:10.3390/ijms25020981), 2024-01-12
Supplement: s1 [file s1]

**Supplementary Table S2. Primers Used for RT-qPCR.**

| Primer Name            | Sequence (5'-3')         |
|------------------------|--------------------------|
| $\beta$ -actin Forward | CTACCTCATGAAGATCCTCACCGA |
| $\beta$ -actin Reverse | TTCTCCTTAATGTCACGCACGATT |
| ID1 Forward            | GTTGGAGCTGAACTCGGAATCC   |
| ID1 Reverse            | ACACAAGATGCGATCGTCCGCA   |
| CyclinD1 Forward       | CGATGCCAACCTCCTCAACGA    |
| CyclinD1 Reverse       | TCGCAGACCTCCAGCATCCA     |
| CCND1-5'UTR Forward    | CAGTAACGTCACACGGACTAC    |
| CCND1-5'UTR Reverse    | GTCTGTAGCTCTCTGCTACTGCG  |
| FTO Forward            | CCCTGTGAGCAGCAACATAAG    |
| FTO Reverse            | CAACCCGACCCAGTCTAAATC    |
| YTHDF2 Forward         | ATAGGAAAAGCCAATGGAGGG    |
| YTHDF2 Reverse         | CCAAAAGGTCAAGGAAACAAAG   |
